# Supplementary material for: Enhancement in room temperature ammonia sensing properties of naphthalene diimides through core expansion
Source: Royal Society of Chemistry journal article supplement (doi:10.1039/d1tc05362k), 2021-12-20
Supplement: d1tc05362k1.pdf [file d1tc05362k1.pdf]

## Supplementary Information

### Enhancement in Room Temperature Ammonia Sensing Properties of Naphthalene Diimides through Core Expansion

Salman Ali<sup>a</sup>, Mohammed A. Jameel<sup>a</sup>, Glenn Oldham<sup>a</sup>, Akhil Gupta<sup>a</sup>, Mahnaz Shafiei<sup>a,\*</sup>, Steven J. Langford<sup>ab,\*</sup>

<sup>a</sup>*School of Science, Computing and Engineering Technologies, Swinburne University of Technology, Hawthorn Victoria 3122 Australia.*

<sup>b</sup>*School of Mathematical and Physical Sciences, University of Technology Sydney, Ultimo NSW 2007 Australia*

\*Corresponding authors: [mshafiei@swin.edu.au](mailto:mshafiei@swin.edu.au); [steven.langford@uts.edu.au](mailto:steven.langford@uts.edu.au)

#### NMR of NDI-CN<sub>4</sub>:

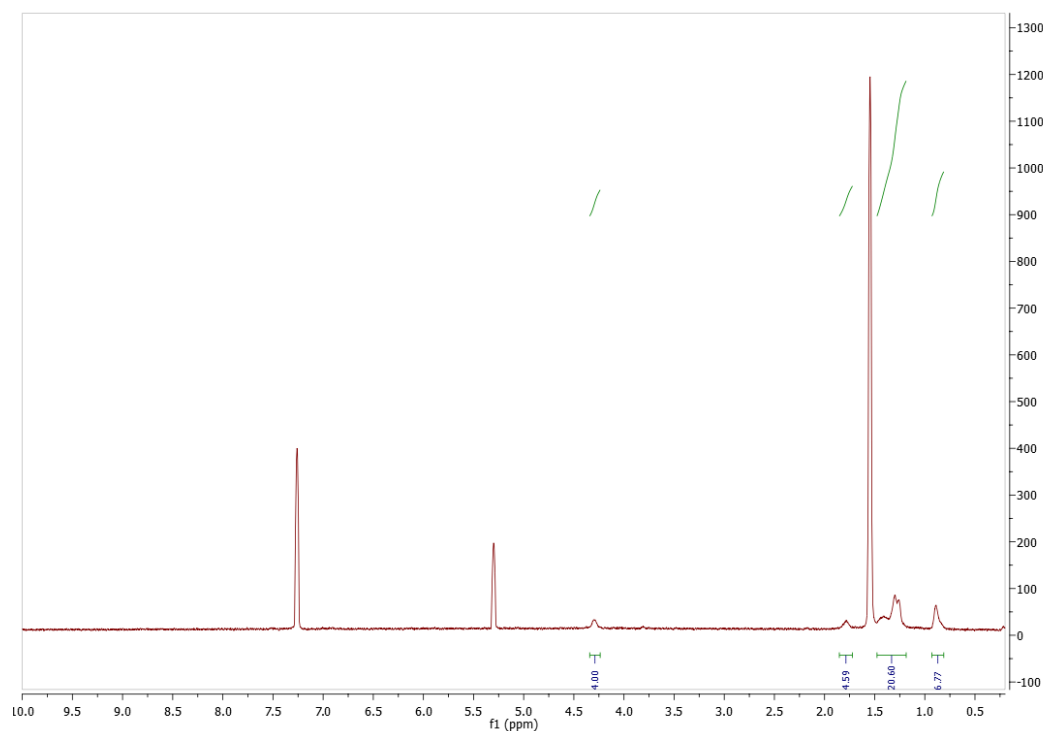

### NMR of NDI-H<sub>4</sub>:

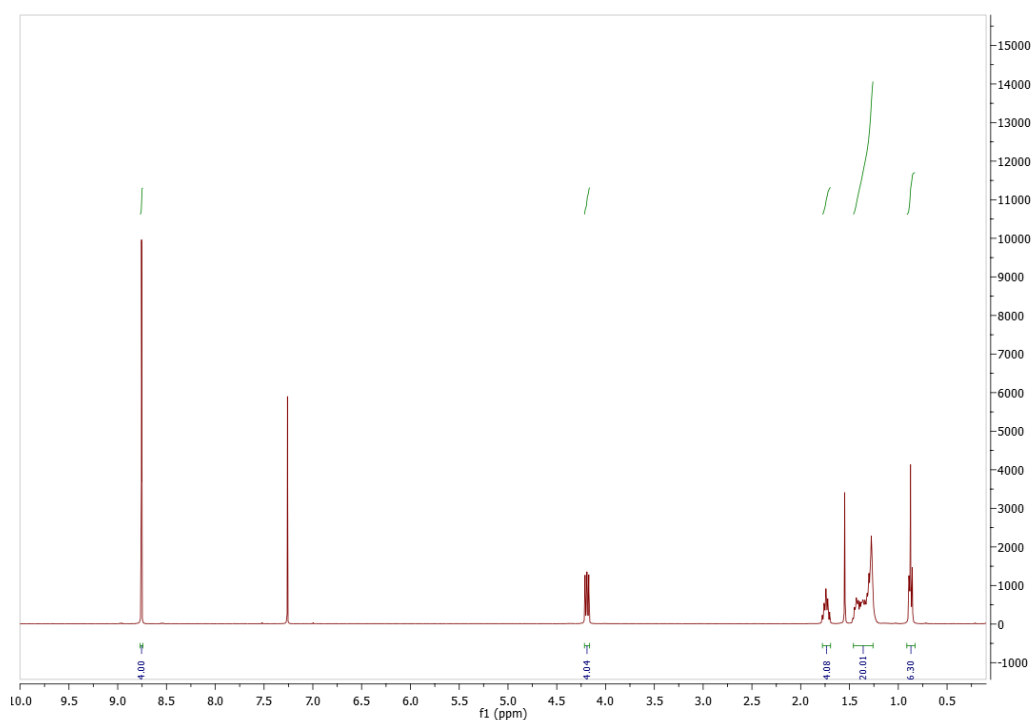

### Recyclability studies of NDI-CN<sub>4</sub> sensor towards various concentrations of ammonia

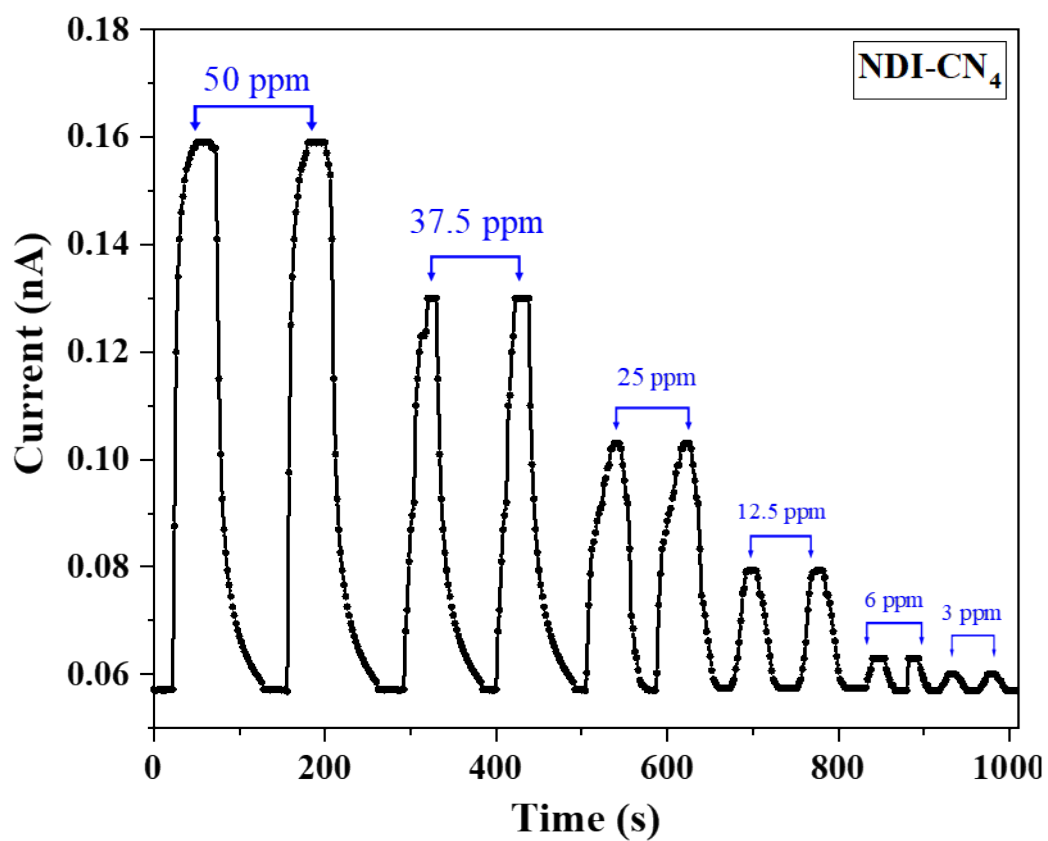

Fig. S1: Response of NDI-CN<sub>4</sub> towards various concentrations of ammonia

## Cyclic voltammetry study of NDI-H<sub>4</sub> and NDI-CN<sub>4</sub>

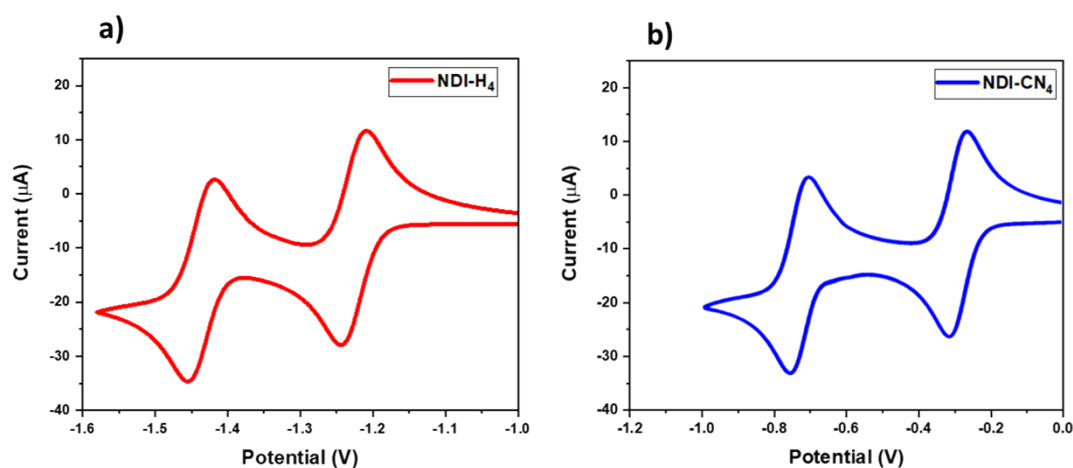

**Fig. S2:** Cyclic voltammograms of (a) NDI-H<sub>4</sub> and (b) NDI-CN<sub>4</sub>, run in dichloromethane (DCM) at a sweep rate of 50 mV per second.

**Table S1.** Frontier molecular orbital energies as estimated from cyclic voltammetry and optical absorption

| Materials           | E <sub>red onset</sub> | LUMO (eV) | HOMO (eV) | λ <sub>abs onset</sub> | E <sub>g</sub> (eV) |
|---------------------|------------------------|-----------|-----------|------------------------|---------------------|
| NDI-H <sub>4</sub>  | -1.18                  | -3.22     | -6.58     | 368 nm                 | 3.36                |
| NDI-CN <sub>4</sub> | -0.21                  | -4.19     | -6.33     | 578 nm                 | 2.14                |

The details of calculations regarding E<sub>red onset</sub>, HOMO/LUMO levels, λ<sub>abs onset</sub> and E<sub>g</sub> (eV) are given in the previous reports.<sup>1,2</sup>

1. Y. Hu, X. Gao, C.-a. Di, X. Yang, F. Zhang, Y. Liu, H. Li and D. Zhu, *Chem. Mater.*, 2011, **23**, 1204-1215.
2. L. Leonat, G. Sbarcea and I. V. Branzoi, *UPB Sci Bull Ser B*, 2013, **75**, 111-118.
